# Supplementary material for: Monoclinic WO3 nanorods–rutile TiO2 nanoparticles core–shell interface for efficient DSSCs
Source: Royal Society of Chemistry journal article supplement (doi:10.1039/c3dt50728a), 2013-01-01
Supplement: c3dt50728a.pdf [file c3dt50728a.pdf]

## Supporting Information (SI)

# Monoclinic WO<sub>3</sub> Nanorods-Rutile TiO<sub>2</sub> Nanoparticles Core-shell Interface for Efficient DSSCs

Shoyeb Mohamad F. Shaikh,<sup>a,b</sup> Shankara S. Kalanur,<sup>a</sup> Rajaram S. Mane,<sup>a</sup> and Oh-Shim Joo\*<sup>a</sup>

<sup>a</sup>Clean Energy Research Centre, Korea Institute of Science and Technology, Seongbuk-gu, Seoul 130-650, Republic of Korea

<sup>b</sup>School of Science, University of Science and Technology, 52, Eoeun dong, Yuseong-gu, Daejeon 305-333, Republic of Korea

### SI (I): Experimental Details

#### *Synthesis of WO<sub>3</sub> Nanorods*

In a typical synthesis, 1 g of ammonium paratungstate {(NH<sub>4</sub>)<sub>10</sub>(W<sub>12</sub>O<sub>42</sub>)·5H<sub>2</sub>O} was dissolved in 95 ml de-ionized (D. I) water. 1-10 ml of concentrated HCl was added (0.125-1.25 M) in drops to above aqueous solution and stirred. The stirring time was dependent on the amount of HCl added. The solution initially turns to transparent light yellow and then yellow with formation of gelatinous precipitate. 2 ml of H<sub>2</sub>O<sub>2</sub> was added and stirred strongly for 1 h to dissolve tungstic acid. This results in the formation of stable and transparent solution that is stable up to 2 days. As-prepared solution was transferred to Teflon-lined autoclave to fill 80% of its total capacity. FTO substrate, previously cleaned sequentially by D.I Water, acetone and isopropanol, was placed tilted against the wall of the Teflon-liner with the conducting side facing downwards. The

hydrothermal synthesis was conducted at 120~200 °C for 1~14 h. After synthesis, the autoclave was cooled down to room temperature naturally. The FTO substrate was taken out and rinsed with de-ionized water and annealed at 500 °C for 1 h.

### ***Synthesis of TiO<sub>2</sub> Nanoparticles***

The chemicals used for synthesis of TiO<sub>2</sub> were titanium trichloride, hydrogen peroxide and thiourea. In detail, first take 2 ml of titanium (III) chloride, about 10 wt% solution in 20– 30 wt% hydrochloric acid, was added drop-wise to a well stirred hydrogen peroxide (H<sub>2</sub>O<sub>2</sub>) and distil water solution. The pH was adjusted ~2 using an addition of 7% liquid ammonium hydroxide with constant stirring. To this, 0.1 M thiourea was added slowly while stirring. A transparent solution with a reddish-yellow color was obtained after vigorous stirring for 30 min at room temperature. The resulting solution was then refluxed for 1 h in a controlled temperature oil bath preheated at 50 °C. The WO<sub>3</sub> NRs substrate was transferred into a jar containing the resulting solution, and then the jar was sealed to avoid thermal evaporation of solution and put into an oven maintained at 70 °C for about 2 h. Finally, the films were washed with de-ionized water several times to remove any residue and then air dried. Heat the film at 350 °C for 1h at 5 deg/min constant heating rate. After annealing, the substrate was immersed into dye solution for 24 h to adsorption of dye molecule.

## *Measurements*

Crystalline phases of the as-prepared powders were investigated by an X-ray diffraction (XRD) method (XRD-6000 X-ray diffractometer (Shimadzu) with a Cu-K $\alpha$  radiation source and a fixed power source (40 kV and 40 mA). The morphologies of the as-prepared WO<sub>3</sub> NRs and WO<sub>3</sub> NRs-TiO<sub>2</sub> NPs were analyzed using a field emission scanning electron microscope (FE-SEM S-4100), and high-resolution transmission electron microscope (HR-TEM, Tecnai G20). UV-Vis absorption spectra were recorded using a Varian Cary 5000 spectrophotometer instrument. Sun 2000 solar simulator (ABET Technologies, USA) calibrated to AM 1.5 irradiance conditions was used as light source. The incident photon-to-current conversion efficiency (IPCE) measurements were carried out using a Thermo Oriel xenon arc lamp (Thermo Oriel 66902) combined with a Thermo Oriel Cornerstone 7400 1/8 m monochromator (Thermo Oriel 7400). An electrochemical interface (Iviumstat) was employed to record the solar cell performance. X-ray photoelectron spectroscopy (XPS) measurements were performed with (PHI 5000 Versa Probe, Japan) using a monochromatic Mg source (Mg K $\alpha$  1253.6 eV, 200 W) and a standard peak of C1s (284.6 eV). Moreover, the Brunauer–Emmett–Teller (BET) surface area and pore volume were measured by the nitrogen gas adsorption–desorption method at 77 K using on a (Belsorp II, BET, Japan Inc.).

**Fig. S1**

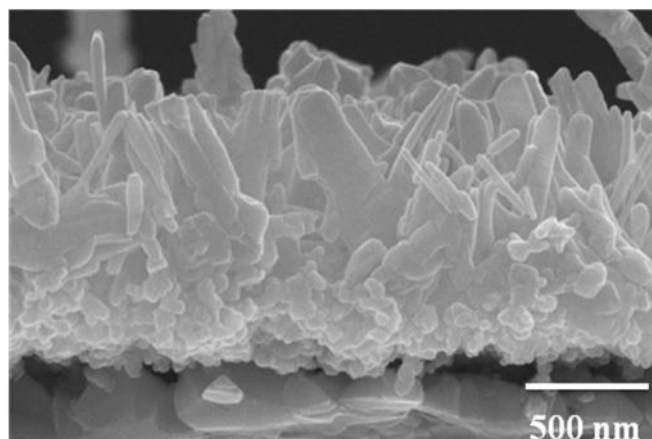

**Fig. S1:** Close cross-sectional view of WO<sub>3</sub> NRs.

### **SI (II): X-ray diffraction (XRD) studies**

The XRD spectra were obtained for WO<sub>3</sub> NRs and WO<sub>3</sub> NRs-TiO<sub>2</sub> NPs electrodes at room temperature. The crystalline and nearly amorphous phases of WO<sub>3</sub> NRs and WO<sub>3</sub> NRs-TiO<sub>2</sub> NPs electrodes were confirmed. The sharp peaks were noticed for WO<sub>3</sub> NRs electrode which practically remained unchanged after TiO<sub>2</sub> NPs over loading it. The XRD pattern of WO<sub>3</sub> NRs can be indexed monoclinic phase with unit cell parameter  $a=0.7297\text{nm}$ ,  $b=0.7539\text{nm}$ ,  $c=0.7688\text{nm}$  and  $\beta=90.91^\circ$  compared to the JCPDS (43-1035) database<sup>1</sup> in Fig.S2. From the XRD spectrum of WO<sub>3</sub> NRs-TiO<sub>2</sub> NPs it was difficult to confirm exact phase of TiO<sub>2</sub> NPs. There were no peaks belong to any phase of TiO<sub>2</sub> NPs.

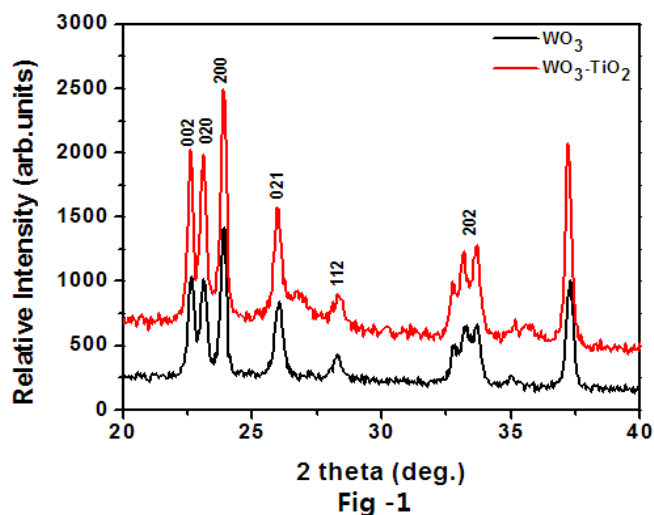

**Fig. S2:** X-ray diffraction pattern of  $\text{WO}_3$  NRs and  $\text{WO}_3\text{NRs-TiO}_2$  NPs

### SI (III): BET surface area and pore size

Nitrogen adsorption–desorption isotherms were measured to determine the specific surface area and pore size volume of the  $\text{WO}_3$  NRs [Fig. S3 (a, b)]. The isotherm displays a typical type IV curve with a hysteresis loop at relative pressure ( $P/P_0$ ) between 0.0 and 1.0, suggesting the presence of mesoporosity in the products.<sup>2-4</sup>

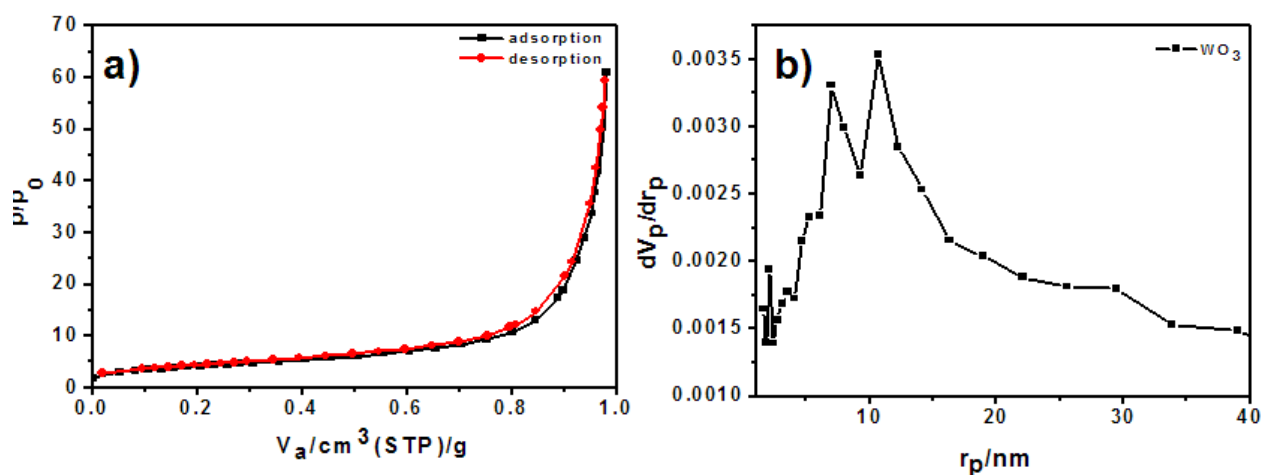

**Fig.S3 (a, b):** a) Nitrogen adsorption–desorption isotherm, and b) Pore size distribution of  $\text{WO}_3$  NRs powder.

### SI (IV): The X-ray photoelectron spectroscopy (XPS) study

The XPS spectra of the  $\text{WO}_3\text{NRs-TiO}_2$  NPs are shown in (Fig.S4 (a-c)). These indicate that the  $\text{WO}_3\text{NRs-TiO}_2$  NPs core-shell structure has been formed.<sup>5,6</sup>

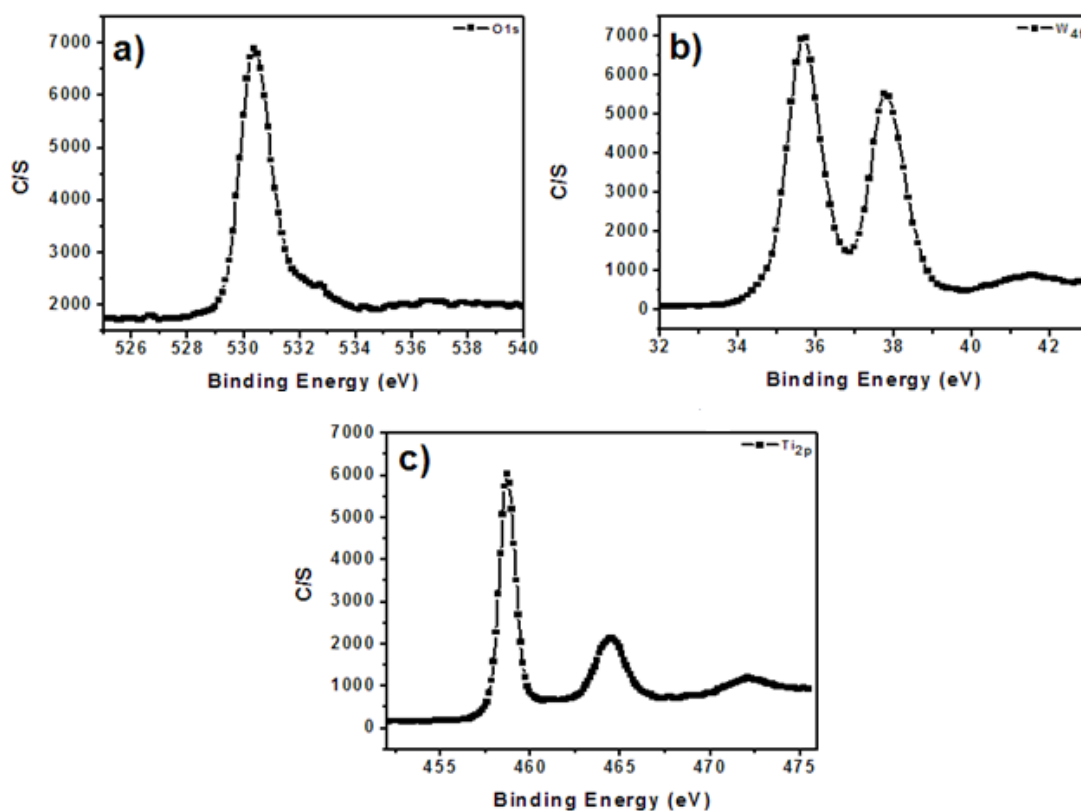

**Fig.S4 (a-c):** XPS spectra of; a) O1s, b) W4f, and c) Ti2p.

**Table S1:** Photovoltaic parameters obtained from *J-V* curves for Monoclinic WO<sub>3</sub> NRs- Rutile TiO<sub>2</sub> NPs measured under 1 Sun illumination.

| <b>Electrodes</b>                         | <b><i>J</i><sub>sc</sub></b><br><b>(mA/cm<sup>-2</sup>)</b> | <b><i>V</i><sub>oc</sub></b><br><b>(V)</b> | <b>FF</b><br><b>(%)</b> | <b>Efficiency</b><br><b>(%)</b> |
|-------------------------------------------|-------------------------------------------------------------|--------------------------------------------|-------------------------|---------------------------------|
| <b>WO<sub>3</sub> NRs</b>                 | 0.14                                                        | 0.19                                       | 20.7                    | 0.006                           |
| <b>WO<sub>3</sub> NRs-dye</b>             | 0.90                                                        | 0.35                                       | 38.0                    | 0.12                            |
| <b>WO<sub>3</sub>-TiO<sub>2</sub>-dye</b> | 5.60                                                        | 0.44                                       | 49.0                    | 1.21                            |

**Table S2:** Electronic parameter was used for fitting Nyquist plots, of WO<sub>3</sub> NRs, WO<sub>3</sub> NRs –dye and WO<sub>3</sub>-TiO<sub>2</sub>-dye electrodes.

| <b>Electrodes</b>                         | <b>R<sub>s</sub> (Ω.cm<sup>2</sup>)</b> | <b>R<sub>1</sub> (Ω.cm<sup>2</sup>)</b> | <b>R<sub>2</sub> (Ω.cm<sup>2</sup>)</b> |
|-------------------------------------------|-----------------------------------------|-----------------------------------------|-----------------------------------------|
| <b>WO<sub>3</sub> NRs</b>                 | 9.21                                    | 3.40                                    | 4561.44                                 |
| <b>WO<sub>3</sub> NRs-dye</b>             | 16.61                                   | 3.68                                    | 2794.76                                 |
| <b>WO<sub>3</sub>-TiO<sub>2</sub>-dye</b> | 10.07                                   | 3.21                                    | 2120.68                                 |

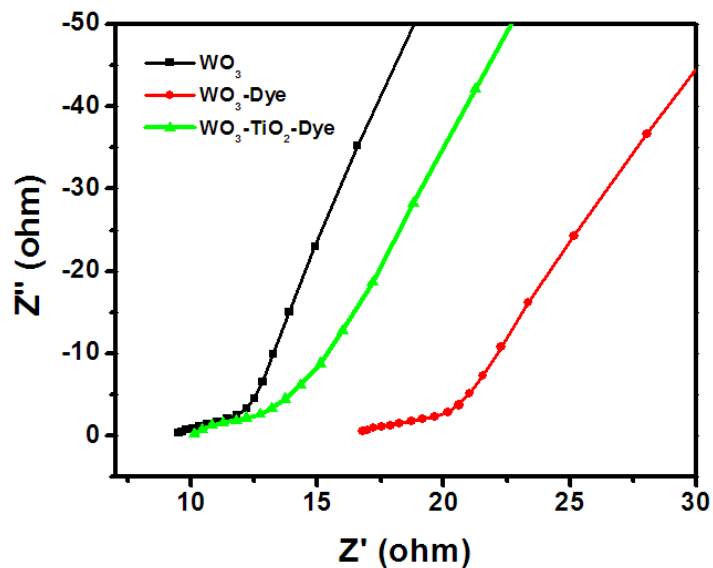

**Fig. S5.** High frequency region of the Nyquist plots.

## References

1. B. Cao, J. Chen, X. Tang and W. Zhou, *J. Mater. Chem.*, 2009, 19, 2323.
2. X. Chen, Y. F. Shen, S. L. Suib and C. L. O' Young, *Chem. Mater.*, 2002, 14, 940.
3. P. Z. Araujo, V. Luca, P. B. Bozzano, H. L. Bianchi, G. Soler-Illia and M. A. Blesa, *ACS Appl. Mater. Interfaces*, 2010, 2, 1663.
4. J. Li, X. Liu, Q. Han, X. Yao and X. Wang, *J. Mater. Chem. A*, 2013, 1, 1246.
5. L. Cheng, X. Zhang, B. Liu, H. Wang, Y. Li, Y. Huang and Z. Du, *Nanotechnology*, 2005, 16, 1341.
6. J. H. Pan and W. I. Lee, *Chem. Mater.* 2006, 18, 847.
